# Supplementary material for: Isolation and Identification of Indole Alkaloids from Aspergillus amstelodami BSX001 and Optimization of Ultrasound-Assisted Extraction of Neoechinulin A
Source: MDPI journal article supplement (doi:10.3390/microorganisms12050864), 2024-04-26

## Supplementary materials

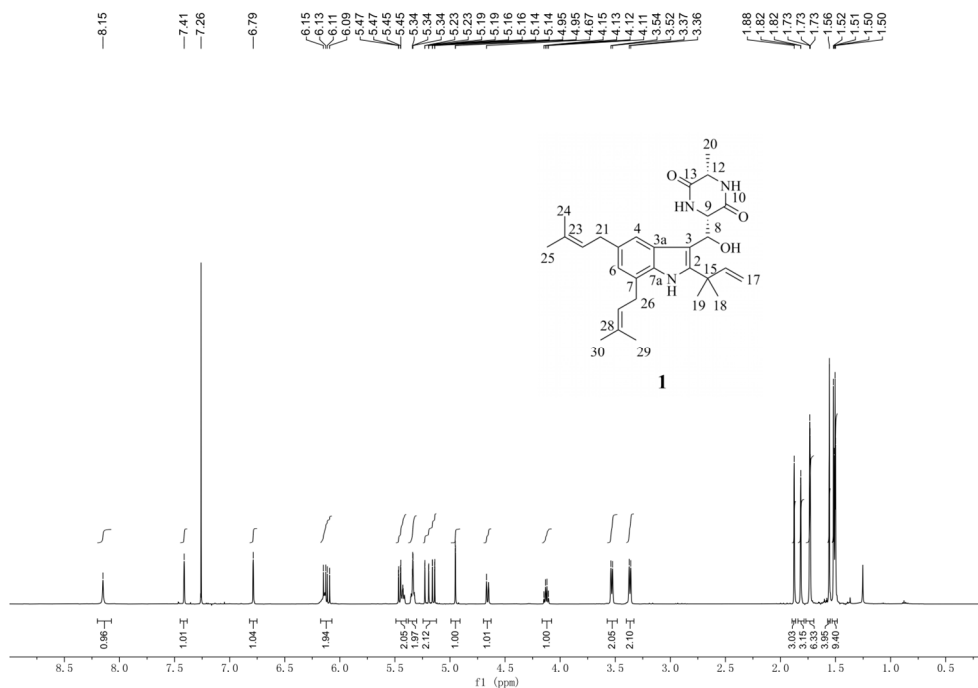

Figure S1.  $^1\text{H}$  NMR spectrum (500 MHz) of **1**.

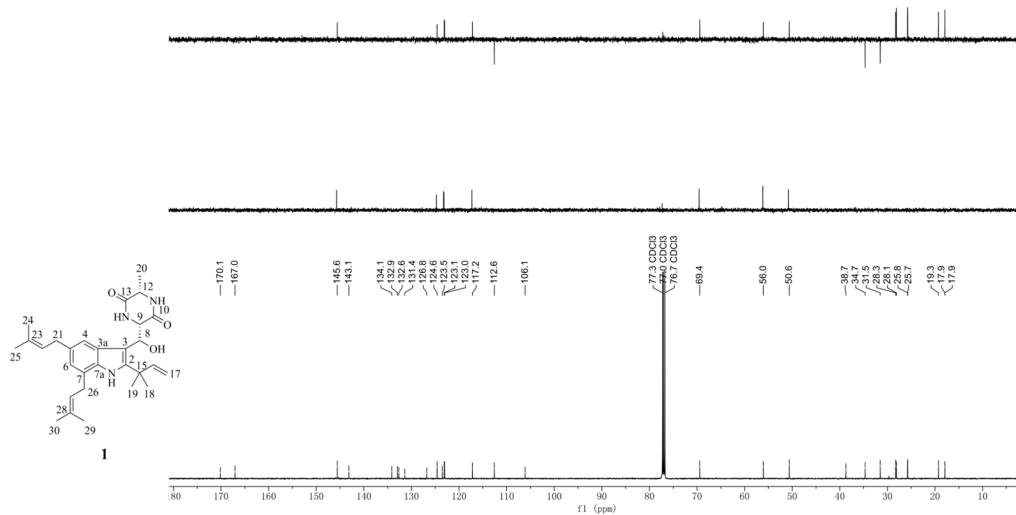

Figure S2.  $^{13}\text{C}$  NMR and DEPT spectrum (125 MHz) of **1**.

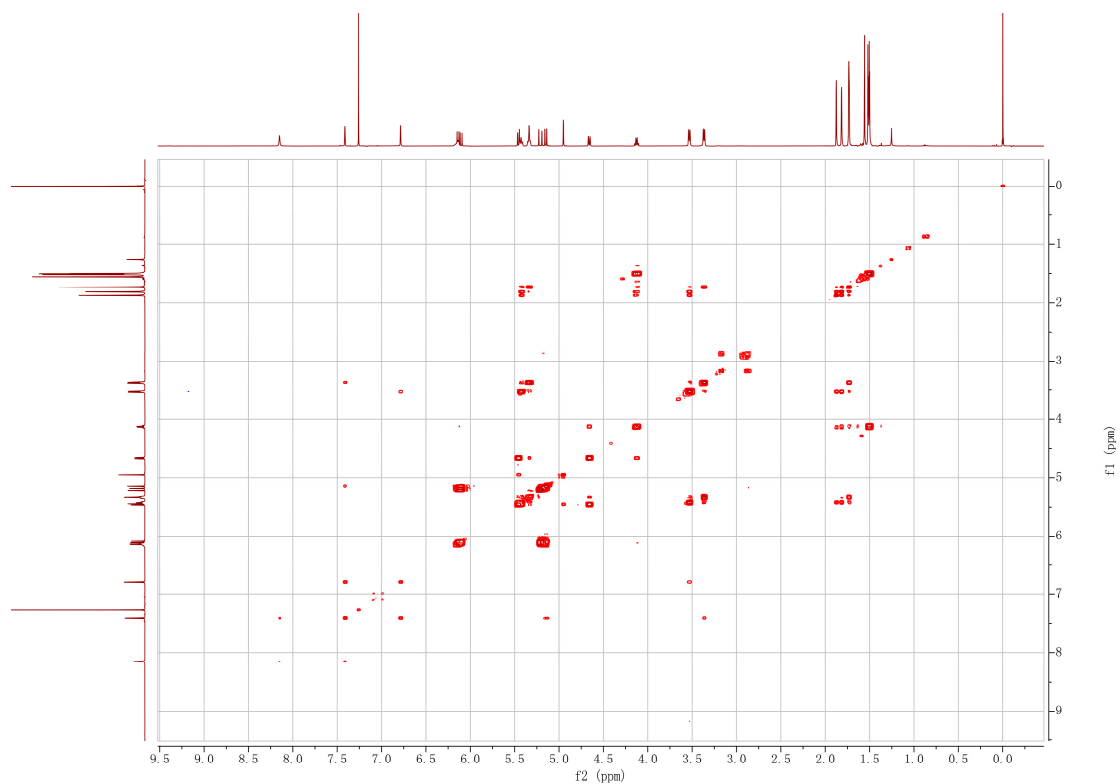

Figure S3. COSY spectrum of **1**.

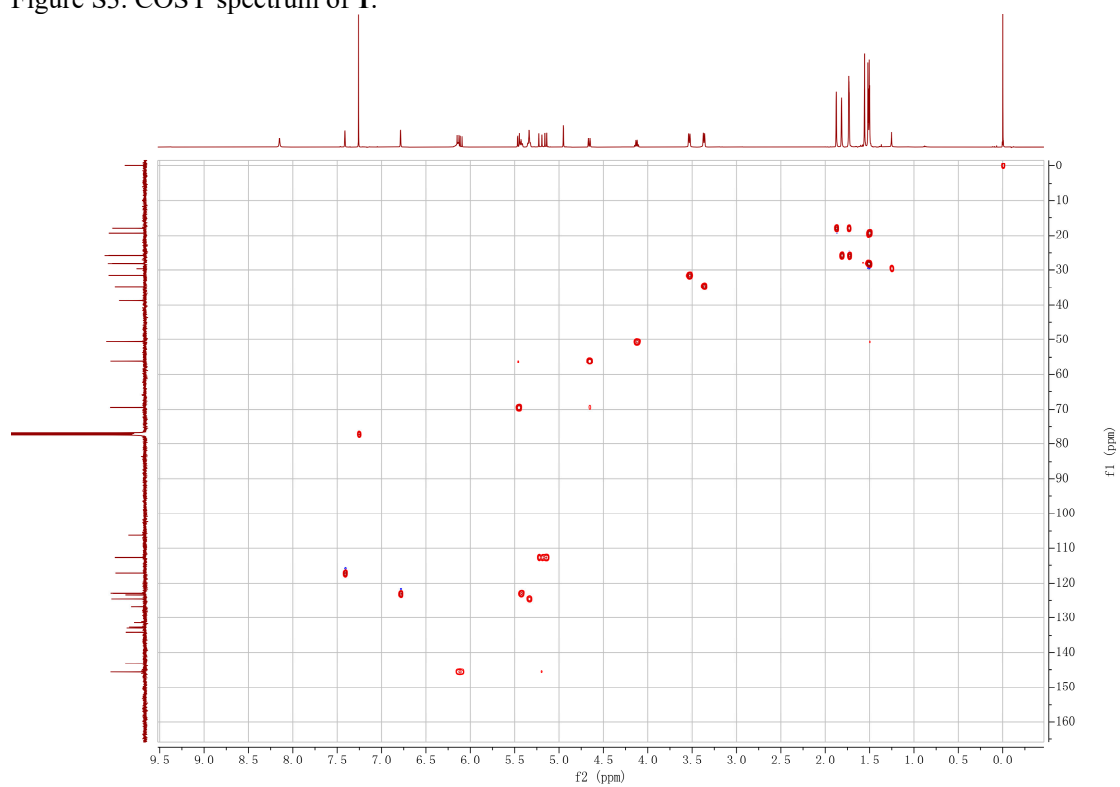

Figure S4. HSQC spectrum of **1**.

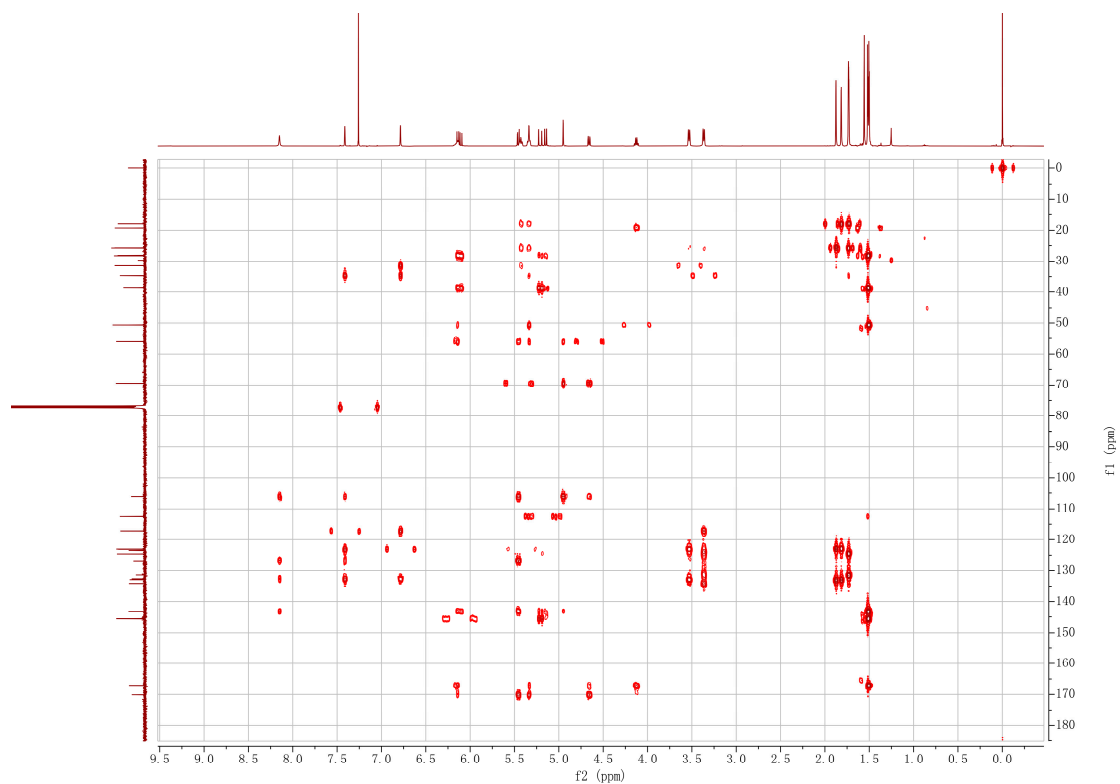

Figure S5. HMBC spectrum of **1**.

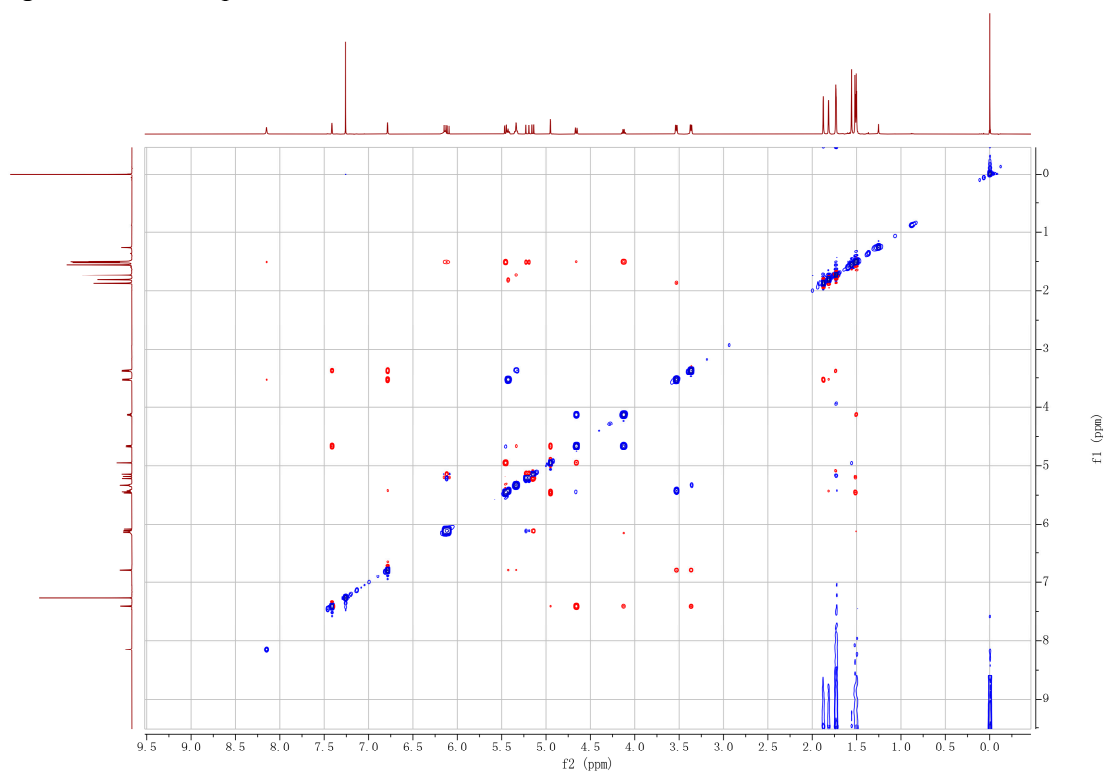

Figure S6. ROESY spectrum of **1**.

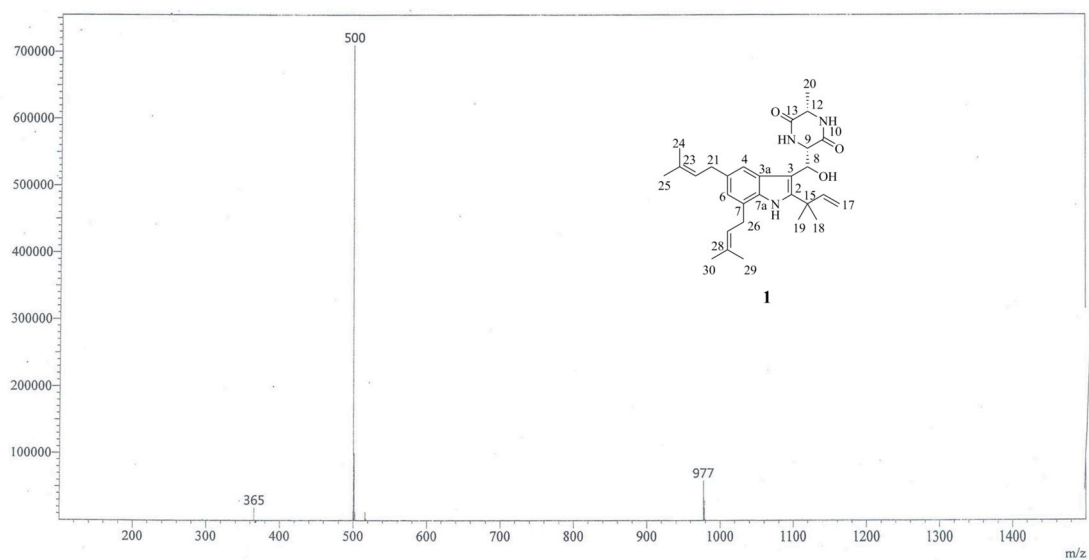

Figure S7. ESI-MS spectrum of **1**.

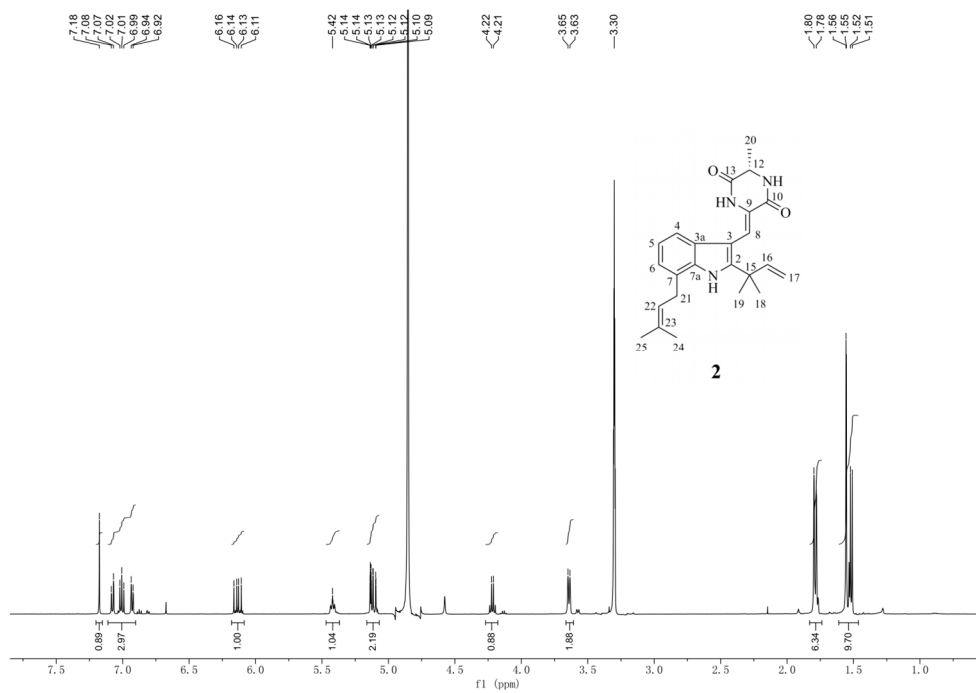

Figure S8.  $^1\text{H}$  NMR spectrum (500 MHz) of **2**.

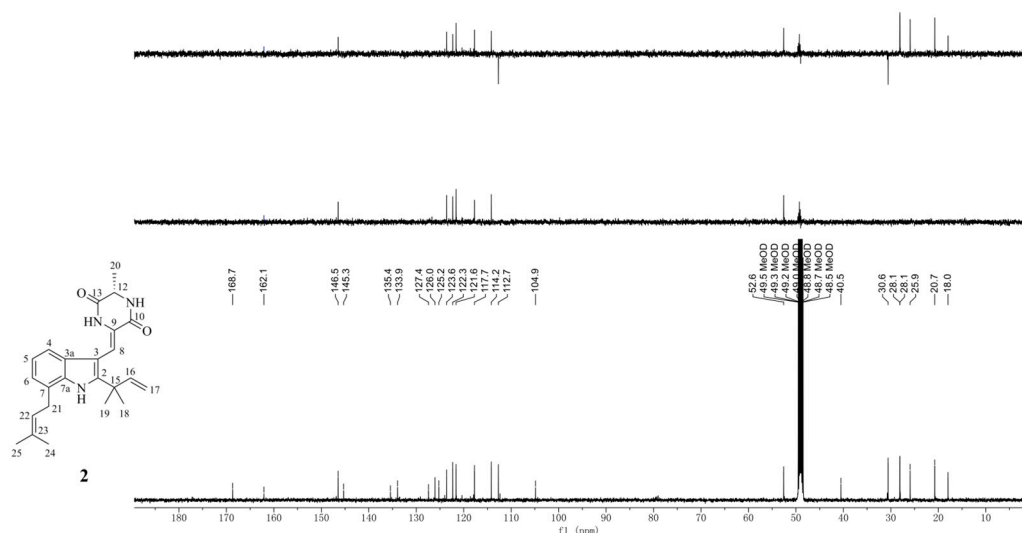

Figure S9.  $^{13}\text{C}$  NMR and DEPT spectrum (125 MHz) of **2**.

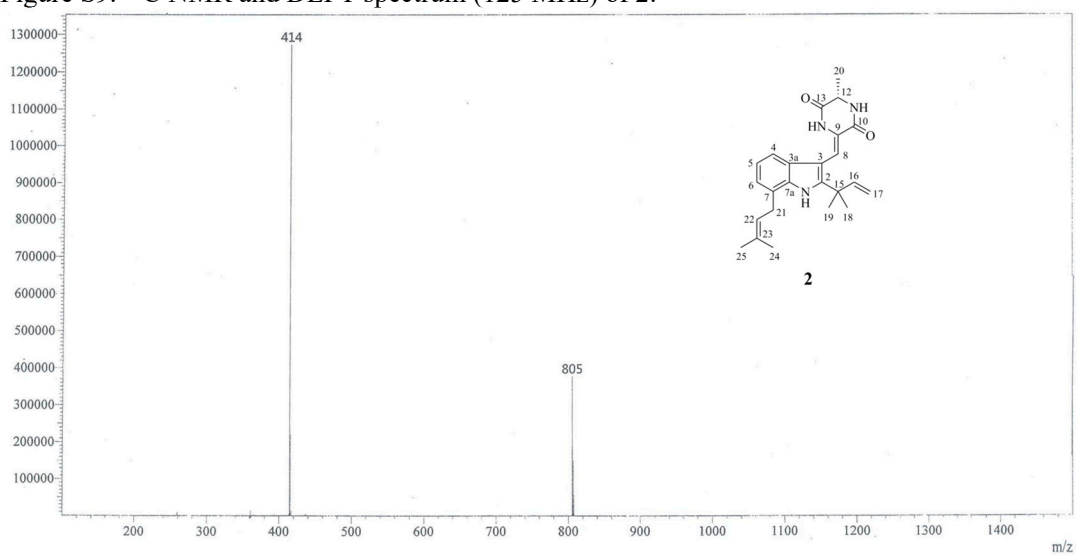

Figure S10. ESI-MS spectrum of **2**.

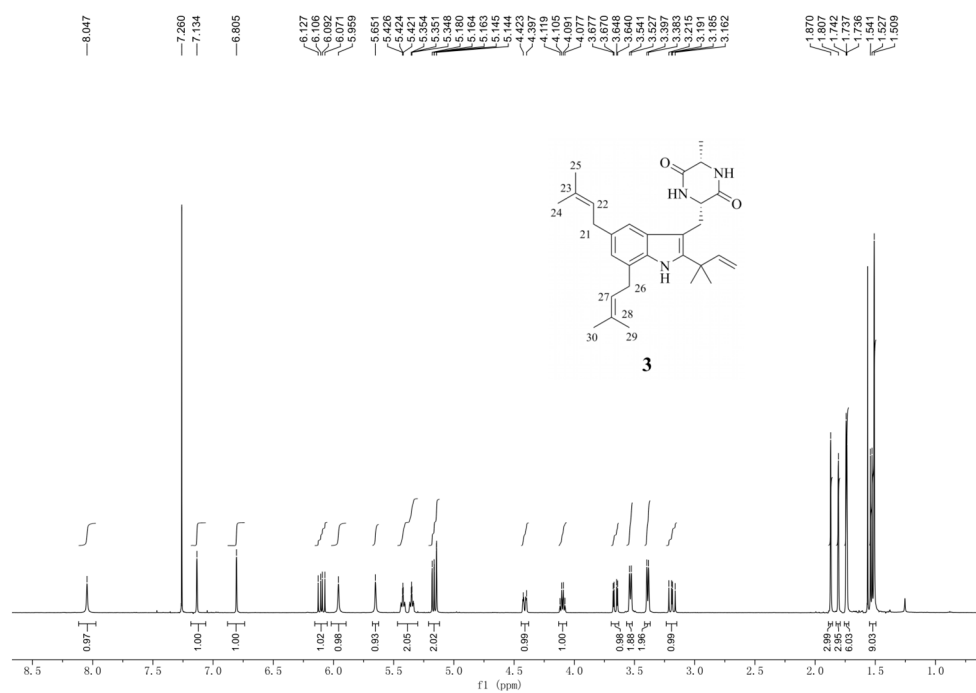

Figure S11. <sup>1</sup>H NMR spectrum (500 MHz) of **3**.

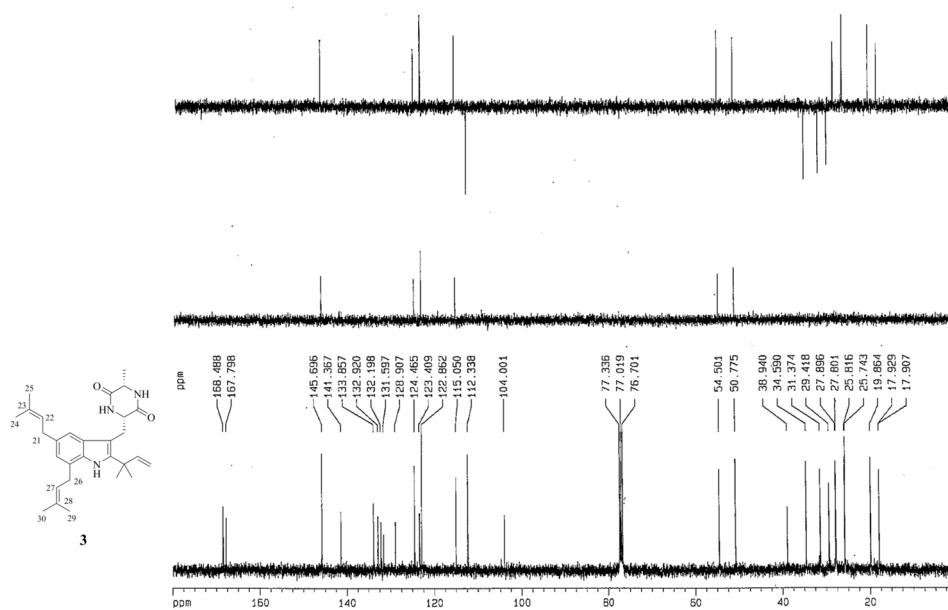

Figure S12. <sup>13</sup>C NMR and DEPT spectrum (125 MHz) of **3**.

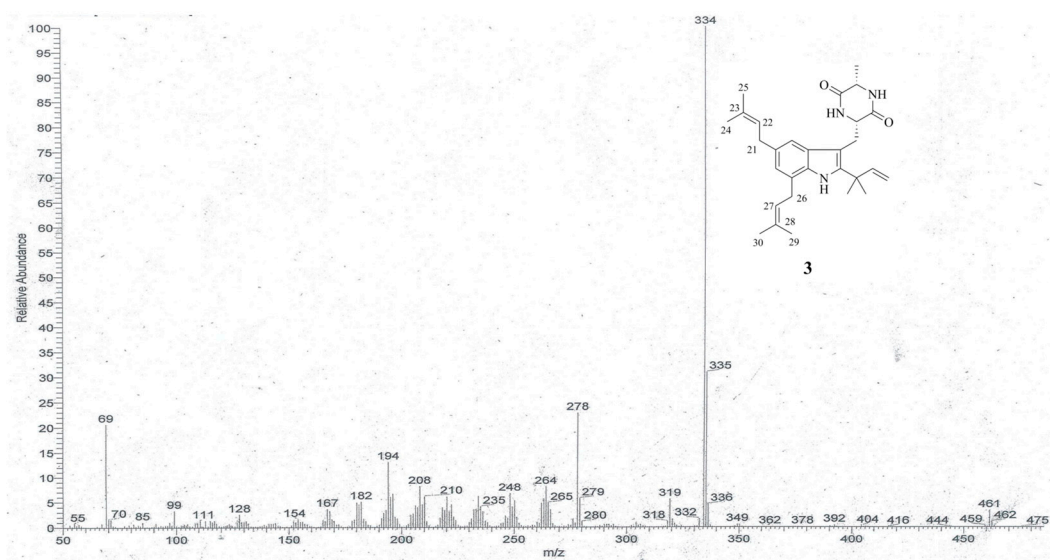

Figure S13. EI-MS spectrum of **3**.

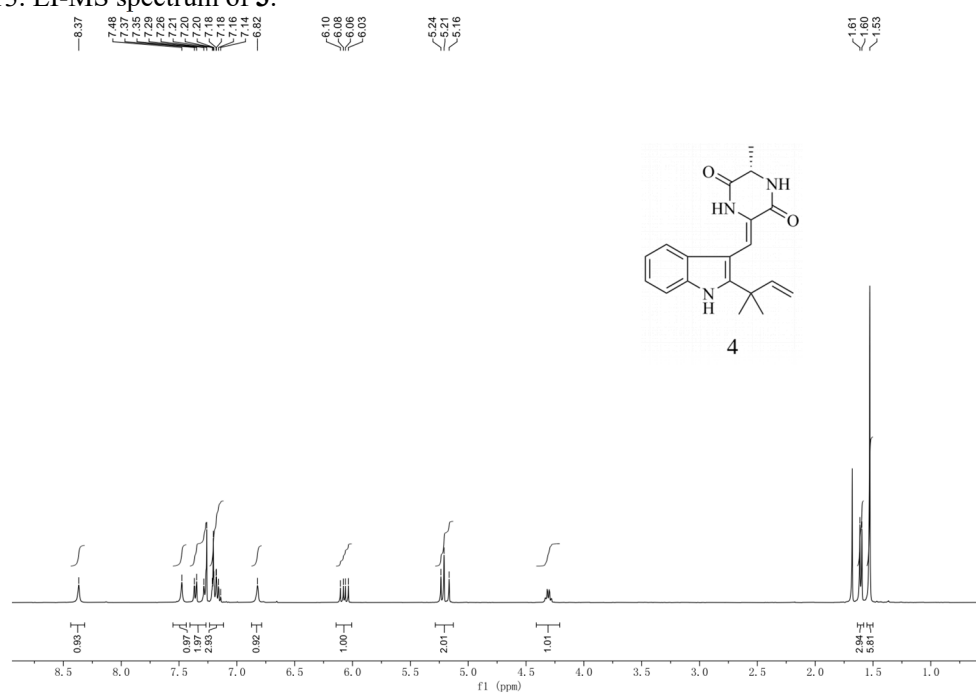

Figure S14. <sup>1</sup>H NMR spectrum (500 MHz) of **4**.

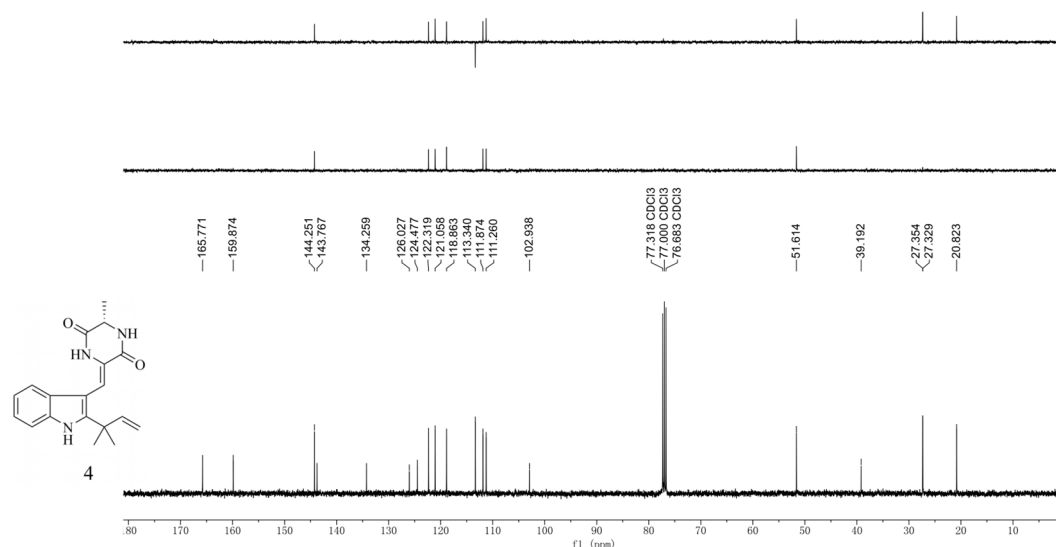

Figure S15. <sup>13</sup>C NMR and DEPT spectrum (125 MHz) of 4.

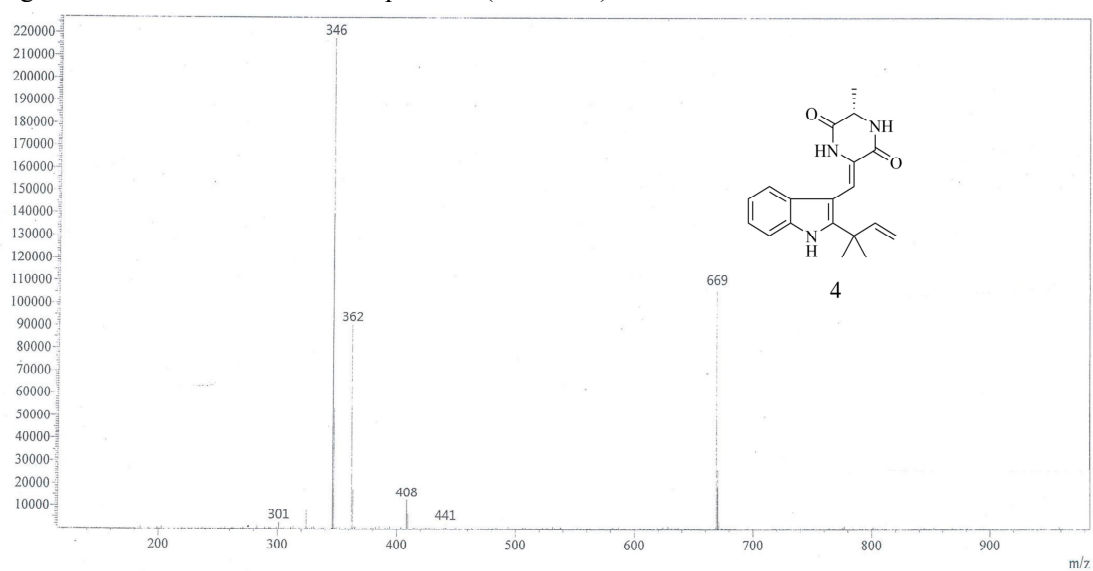

Figure S16. ESI-MS spectrum of 4.



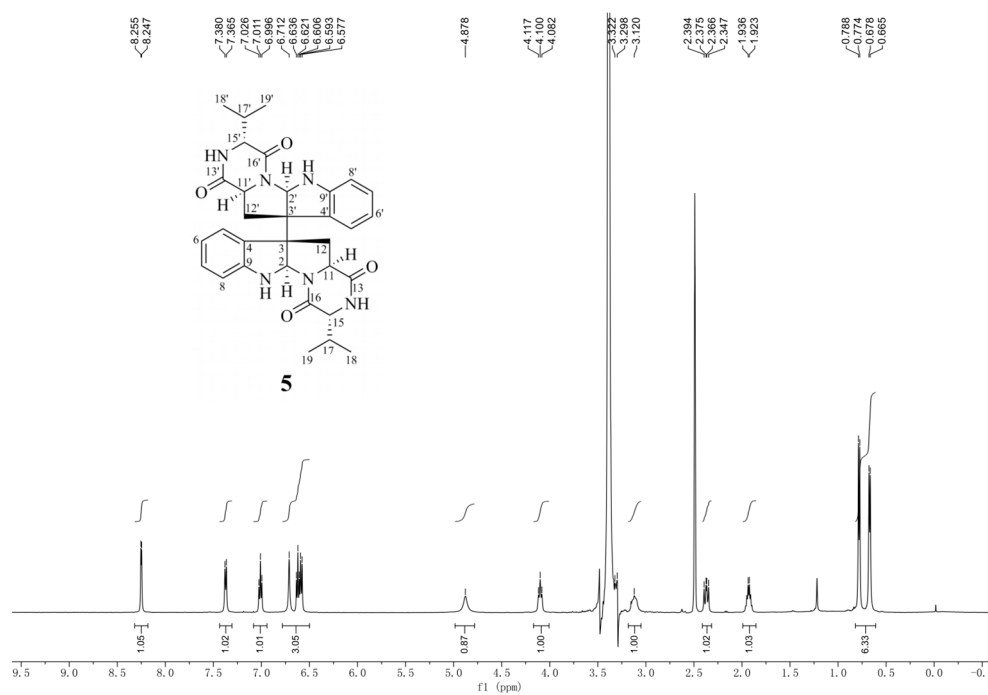

Figure S17.  $^1\text{H}$  NMR spectrum (500 MHz) of **5**.

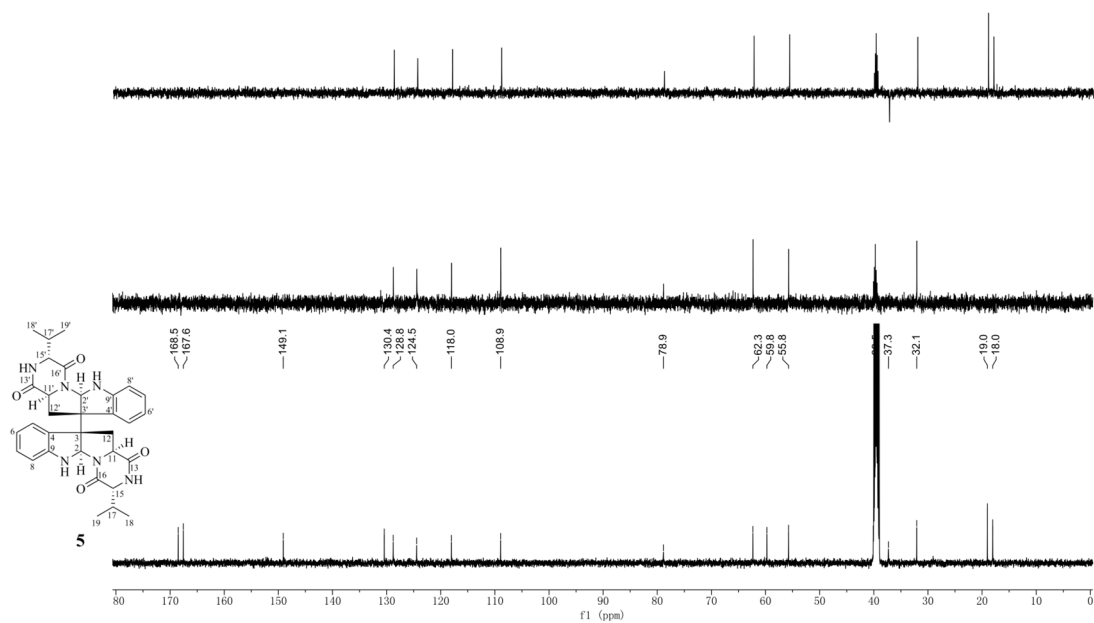

Figure S18.  $^{13}\text{C}$  NMR and DEPT spectrum (125 MHz) of **5**.

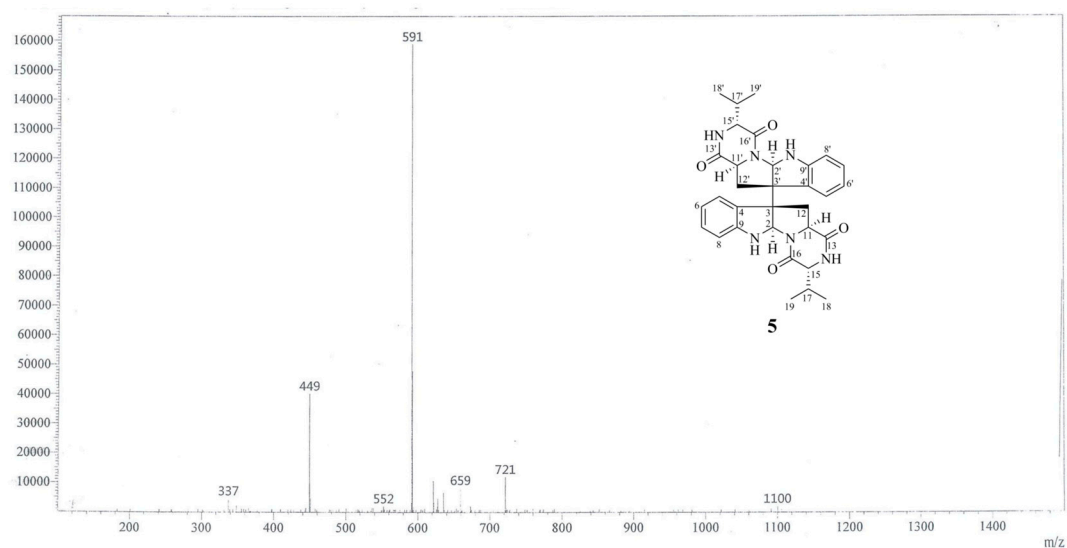

Figure S19. ESI-MS spectrum of **5**.

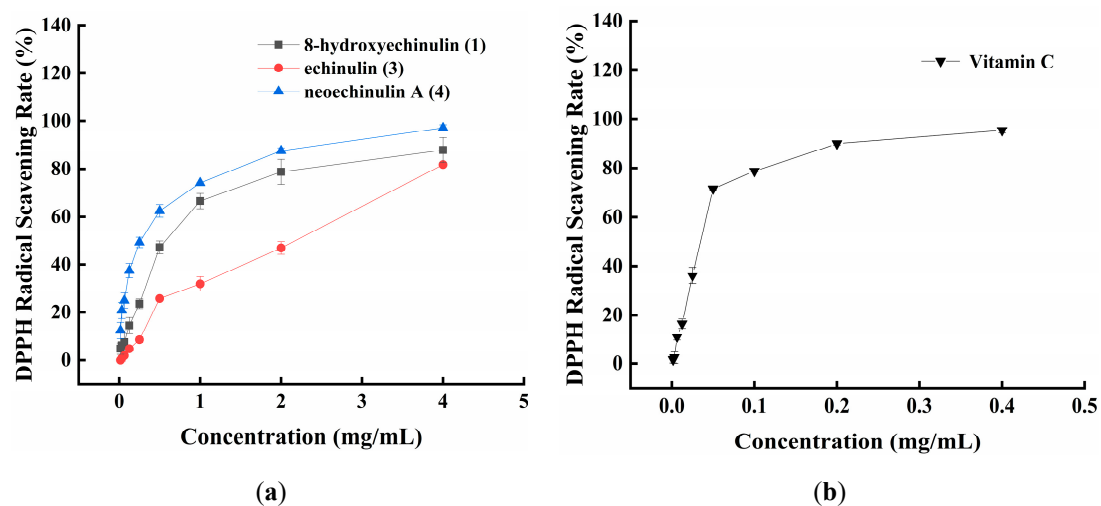

Figure S20. DPPH radical scavenging capacity. **(a)** 8-hydroxyechinulin (**1**), echinulin (**3**), and neoechinulin A (**4**). **(b)** Vitamin C. Values are expressed as mean  $\pm$  SD of three replicates.

Table S1. NMR spectroscopic data of compound **2** in CD<sub>3</sub>OD ( $\delta$  in ppm).

| No.   | $\delta_C^a$           | $\delta_H^b$ (J in Hz)                       |
|-------|------------------------|----------------------------------------------|
| 1-NH  | -                      | -                                            |
| 2     | 145.3, q               | -                                            |
| 3     | 104.9, q               | -                                            |
| 3a    | 127.4, q               | -                                            |
| 4     | 117.7, CH              | 7.08, br. d (7.1)                            |
| 5     | 121.6, CH              | 7.01, t(7.1)                                 |
| 6     | 122.3, CH              | 6.93, br. d, (7.1)                           |
| 7     | 126, q                 | -                                            |
| 7a    | 135.4, q               | -                                            |
| 8     | 114.4, CH              | 7.18, s                                      |
| 9     | 125.2, q               | -                                            |
| 10    | 162.1, q               | -                                            |
| 11-NH | -                      | -                                            |
| 12    | 52.6, CH               | 4.22, q (7.0)                                |
| 13    | 168.7, q               | -                                            |
| 14-NH | -                      | -                                            |
| 15    | 40.5, q                | -                                            |
| 16    | 146.5, CH              | 6.14, dd (17.4, 10.7)                        |
| 17    | 112.7, CH <sub>2</sub> | 5.11, dd (17.4, 1.0)<br>5.13, dd (10.7, 1.0) |
| 18    | 28.1, CH <sub>3</sub>  | 1.56, s                                      |
| 19    | 28.1, CH <sub>3</sub>  | 1.55, s                                      |
| 20    | 20.7, CH <sub>3</sub>  | 1.52, d (7.0)                                |
| 21    | 30.6, CH <sub>2</sub>  | 3.64, d (7.3)                                |
| 22    | 123.6, CH              | 5.42, m                                      |
| 23    | 133.9, q               | -                                            |
| 24    | 18, CH <sub>3</sub>    | 1.80, br. s                                  |
| 25    | 25.9, CH <sub>3</sub>  | 1.78, br. s                                  |

<sup>a</sup>: Recorded at 125 MHz; <sup>b</sup>: recorded at 500 MHz.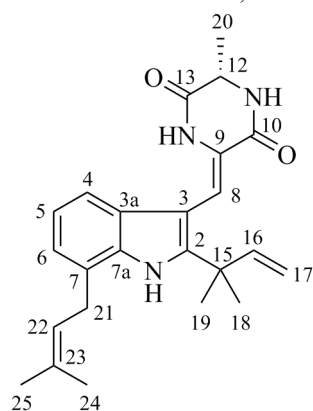

Table S2. NMR spectroscopic data of compound **3** in CDCl<sub>3</sub> ( $\delta$  in ppm).

| No.   | $\delta_C^a$           | $\delta_H^b$ (J in Hz)                        |
|-------|------------------------|-----------------------------------------------|
| 1-NH  | -                      | -                                             |
| 2     | 141.4, qC              | 8.04, s                                       |
| 3     | 104, qC                | -                                             |
| 3a    | 128.9, qC              | -                                             |
| 4     | 115.1, CH              | 7.13, s                                       |
| 5     | 133.9, qC              | -                                             |
| 6     | 122.9, CH              | 6.81, s                                       |
| 7     | 123.4, qC              | -                                             |
| 7a    | 132.2, qC              | -                                             |
| 8     | 29.4, CH <sub>2</sub>  | 3.66, dd (14.8, 3.7)<br>3.19, dd (14.8, 11.4) |
| 9     | 54.5, CH               | 4.41, br. dd (11.4, 3.7)                      |
| 10    | 168.5, qC              | -                                             |
| 11-NH | -                      | 5.96, s                                       |
| 12    | 50.8, CH               | 4.22, q (7.0)                                 |
| 13    | 167.8, qC              | -                                             |
| 14-NH | -                      | 5.65, s                                       |
| 15    | 38.9, qC               | -                                             |
| 16    | 145.7, CH              | 6.10, dd (17.4, 10.6)                         |
| 17    | 112.3, CH <sub>2</sub> | 5.16, dd (17.4, 0.8)<br>5.15, dd (10.6, 0.8)  |
| 18    | 27.8, CH <sub>3</sub>  | 1.51, s                                       |
| 19    | 27.9, CH <sub>3</sub>  |                                               |
| 20    | 19.9, CH <sub>3</sub>  | 1.53, d (7.0)                                 |
| 21    | 34.6, CH <sub>2</sub>  | 3.39, d (7.3)                                 |
| 22    | 124.5, CH              | 5.35, br. t (7.3)                             |
| 23    | 131.6, qC              | -                                             |
| 24    | 17.9, CH <sub>3</sub>  |                                               |
| 25    | 25.7, CH <sub>3</sub>  | 1.74, br. s                                   |
| 26    | 31.4, CH <sub>2</sub>  | 3.53, d (7.2)                                 |
| 27    | 122.9, CH              | 5.42, br. t (7.2)                             |
| 28    | 132.9, qC              | -                                             |
| 29    | 17.9, CH <sub>3</sub>  | 1.87, br. s                                   |
| 30    | 25.8, CH <sub>3</sub>  | 1.81, br. s                                   |

<sup>a</sup>: Recorded at 125 MHz; <sup>b</sup>: recorded at 500 MHz.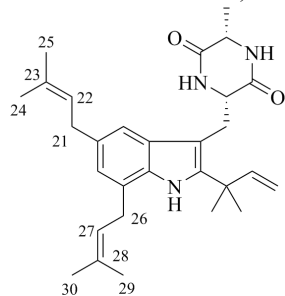

Table S3. NMR spectroscopic data of compound **4** in CDCl<sub>3</sub> ( $\delta$  in ppm).

| No.   | $\delta_C^a$           | $\delta_H^b$ (J in Hz)           |
|-------|------------------------|----------------------------------|
| 1-NH  | -                      | 8.37, s                          |
| 2     | 143.8, qC              | -                                |
| 3     | 102.9, qC              | -                                |
| 3a    | 126, qC                | -                                |
| 4     | 118.9, CH              | 7.28, d (7.7)                    |
| 5     | 121.1, CH              | 7.19, dd (7.7, 7.5)              |
| 6     | 122.3, CH              | 7.16, dd (7.5, 7.0)              |
| 7     | 111.3, qC              | 7.36, d (7.0)                    |
| 7a    | 134.3, qC              | -                                |
| 8     | 111.9, CH              | 7.20, s                          |
| 9     | 124.5, qC              | -                                |
| 10    | 159.8, qC              | -                                |
| 11-NH | -                      | 6.82, s                          |
| 12    | 51.7, CH               | 4.31, br. q (7.0)                |
| 13    | 165.8, qC              | -                                |
| 14-NH | -                      | 7.48, s                          |
| 15    | 39.2, qC               | -                                |
| 16    | 144.3, CH              | 6.07, dd (17.2, 10.5)            |
| 17    | 113.3, CH <sub>2</sub> | 5.22, d (10.5)<br>5.19, d (17.2) |
| 18    | 27.3, CH <sub>3</sub>  | 1.53, s                          |
| 19    | 27.4, CH <sub>3</sub>  |                                  |
| 20    | 20.8, CH <sub>3</sub>  | 1.61, d (7.0)                    |

<sup>a</sup>: Recorded at 125 MHz; <sup>b</sup>: recorded at 500 MHz.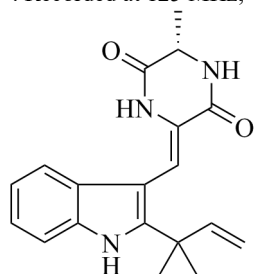

Table S4. NMR spectroscopic data of compound **5** in DMSO-*d*<sub>6</sub> ( $\delta$  in ppm).

| No.       | $\delta_C^a$          | $\delta_H^b$ (J in Hz)               |
|-----------|-----------------------|--------------------------------------|
| 1/1'-NH   | -                     | 6.71, s                              |
| 2/2'      | 78.9, CH              | 4.88, br. s                          |
| 3/3'      | 59.7, qC              | -                                    |
| 4/4'      | 130.4, qC             | -                                    |
| 5/5'      | 124.5, CH             | 7.37, d (7.5)                        |
| 6/6'      | 118.0, CH             | 6.62, t (7.5)                        |
| 7/7'      | 128.8, CH             | 7.01, t (7.5)                        |
| 8/8'      | 108.9, CH             | 6.59, d (7.5)                        |
| 9/9'      | 149.1, qC             | -                                    |
| 10/10'-N  | -                     | -                                    |
| 11/11'    | 55.8, CH              | 4.10, t (8.7)                        |
| 12/12'    | 37.3, CH <sub>2</sub> | 3.12, m                              |
| 13/13'    | 168.5, qC             | -                                    |
| 14/14'-NH | -                     | 8.25, d (4.2)                        |
| 15/15'    | 62.3, CH              | 3.37, overlap<br>2.37, d (14.0, 9.4) |
| 16/16'    | 167.6, qC             | -                                    |
| 17/17'    | 32.0, CH              | 1.93, m                              |
| 18/18'    | 19.0, CH <sub>3</sub> | 0.78, d (6.8)                        |
| 19/19'    | 18.0, CH <sub>3</sub> | 0.67, d (6.6)                        |

<sup>a</sup>: Recorded at 125 MHz; <sup>b</sup>: recorded at 500 MHz.

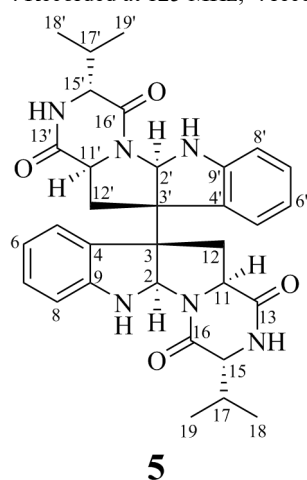

Supplement: s1 [file s1]
